# Supplementary material for: Structure-Guided Design of Selective Epac1 and Epac2 Agonists
Source: PLoS Biol. 2015 Jan 20;13(1):e1002038. doi: 10.1371/journal.pbio.1002038 (PMC4300089; doi:10.1371/journal.pbio.1002038)
Supplement: S1 Data — (XLSX) [file pbio.1002038.s001.xlsx]

## Sheet: Fig.1C
Epac1		Epac1		Epac1 Q270K		Epac1 Q270K			Epac2		Epac2		Epac2 K405Q		Epac2 K405Q
[cAMP] / μM	kobs / s-1	[D-007] / μM	kobs / s-1	[cAMP] / μM	kobs / s-1	[D-007] / μM	kobs / s-1		[cAMP] / μM	kobs / s-1	[D-007] / μM	kobs / s-1	[cAMP] / μM	kobs / s-1	[D-007] / μM	kobs / s-1
1000	0.000763	100	0.002765	800	0.001297	100	0.000522		0.01	3.35e-05	0.01	3.3e-05	0.01	3.5e-05	0.01	7.3e-05
700	0.000732	90	0.002778	600	0.001343	80	0.000487		0.05	4.04e-05	0.05	3.3e-05	0.05	5.6e-05	0.02	0.000108
300	0.000684	80	0.002807	400	0.001179	70	0.000482		0.08	4.47e-05	0.08	3.4e-05	0.08	7.2e-05	0.03	0.000155
100	0.000514	70	0.00285	200	0.001207	60	0.00046		0.1	4.83e-05	0.1	3.5e-05	0.1	8e-05	0.04	0.00019
900	0.000733	60	0.002677	100	0.000922	50	0.000435		0.2	5.75e-05	0.3	4.2e-05	0.2	0.000122	0.05	0.000239
800	0.000762	50	0.00277	80	0.000867	40	0.000383		0.3	7.08e-05	0.5	5.2e-05	0.3	0.000171	0.06	0.000283
600	0.000739	40	0.002852	70	0.000828	30	0.00035		0.4	8.15e-05	0.8	6.3e-05	0.4	0.000205	0.08	0.000356
500	0.000731	30	0.002882	60	0.00083	20	0.000298		0.5	9e-05	1	6.7e-05	0.5	0.000238	0.1	0.000362
0.4	1.7e-05	20	0.002729	50	0.000702	10	0.000187		0.6	0.0001005	2	8.7e-05	0.6	0.000259	0.2	0.000716
0.1	1.1e-05	10	0.002548	40	0.000661	8	0.000163		0.7	0.0001079	3	0.000105	0.7	0.000281	0.3	0.000963
0.08	1.1e-05	9	0.002534	30	0.000559	7	0.000152		0.8	0.0001155	4	0.000116	0.8	0.000298	0.4	0.000979
0.05	1e-05	8	0.00244	20	0.000435	0.1	1.1e-05		1	0.0001167	5	0.000115	1	0.000312	0.5	0.001241
8	0.000116	7	0.002449	0.1	1.1e-05	0.08	1e-05		2	0.000181	6	0.000132	2	0.000392	0.6	0.001431
7	0.0001	6	0.00235	0.08	1.1e-05	0.05	9e-06		3	0.0002051	7	0.000137	3	0.000438	0.7	0.001482
6	9.3e-05	5	0.002169	0.05	1e-05	0.01	7e-06		4	0.0002172	8	0.00014	4	0.000461	0.8	0.001615
5	7.2e-05	4	0.002013	0.01	9e-06	5	0.000131		5	0.0002202	10	0.000148	5	0.000485	1	0.001602
30	0.000269	3	0.00171	5	0.000166	4	0.000114		6	0.0002422	20	0.000171	6	0.000525	2	0.002017
20	0.00022	2	0.001451	4	0.000121	3	9.6e-05		7	0.0002428	30	0.000178	7	0.000529	3	0.002066
10	0.000129	0.9	0.00093	3	9.3e-05	2	7.5e-05		8	0.0002417	40	0.000181	8	0.000524	4	0.002152
9	0.000118	0.8	0.000831	2	6.5e-05	1	3.9e-05		10	0.0002424	50	0.00018	10	0.000537	5	0.002119
70	0.000427	0.7	0.00082	1	4e-05	0.8	3.5e-05		20	0.0002566	60	0.000198	20	0.000616	7	0.002172
60	0.000383	0.6	0.0007	0.8	3.3e-05	0.6	2.5e-05		30	0.0002585	70	0.000198	30	0.00062	8	0.002142
50	0.000365	0.4	0.0005	0.5	2.4e-05	0.3	1.9e-05		40	0.0002591	80	0.000197	40	0.00062	10	0.002172
40	0.000307	0.3	0.000396	0.3	1.8e-05	800	0.000508		50	0.0002596	100	0.000195	50	0.000615	20	0.002162
400	0.000748	0.2	0.000269	10	0.00025	600	0.000526		60	0.0002817			60	0.000642	40	0.00214
200	0.000662	0.1	0.000169	8	0.000215	400	0.000563		70	0.0002772			70	0.000648	60	0.0022
90	0.000562	0.09	0.000136	7	0.000188	200	0.000539		80	0.0002823			80	0.000638	80	0.002174
80	0.000521	0.08	0.000125	6	0.000166				100	0.0002697			100	0.000635	100	0.002096
4	8.8e-05	0.07	0.000111
3	7.7e-05	0.06	9.5e-05
2	5.9e-05	0.05	8.5e-05
1	4.5e-05	0.04	7e-05
		0.03	5.8e-05
		0.01	2.7e-05
		0.008	2.3e-05
		0.005	1.8e-05
		0.001	1.5e-05

## Sheet: Fig.4A & Fig.S1
Epac2		Epac2		Epac2		Epac2		Epac2			Epac2 K450A		Epac2 K450A		Epac2 K450A		Epac2 K450A			Epac2 K450E		Epac2 K450E		Epac2 K450E		Epac2 K450E
[cAMP] / μM	kobs / s-1	[S-000] / μM	kobs / s-1	[L-025] / μM	kobs / s-1	[S-220] / μM	kobs / s-1	[S-230] / μM	kobs / s-1		[cAMP] / μM	kobs / s-1	[S-000] / μM	kobs / s-1	[L-025] / μM	kobs / s-1	[S-220] / μM	kobs / s-1		[cAMP] / μM	kobs / s-1	[S-000] / μM	kobs / s-1	[L-025] / μM	kobs / s-1	[S-220] / μM	kobs / s-1
0.01	2.7e-05	0.01	2.4e-05	0.02	0.000123	0.003	6.6e-05	0.01	3.1e-05		0.01	2.72e-05	0.01	2.9e-05	0.001	4.03e-05	0.001	3.1e-05		0.01	3.01e-05	0.01	4.6e-05	0.001	2.66e-05	0.001	3.4e-05
0.05	3.5e-05	0.05	3.7e-05	0.04	0.000135	0.005	8.7e-05	0.03	5.1e-05		0.05	4e-05	0.03	3.7e-05	0.003	4.45e-05	0.003	3.7e-05		0.05	4.19e-05	0.05	6.3e-05	0.003	2.86e-05	0.003	4.1e-05
0.08	4.1e-05	0.08	4.4e-05	0.05	0.000162	0.008	0.000124	0.04	5.8e-05		0.08	5.02e-05	0.05	4.5e-05	0.005	4.15e-05	0.005	4.4e-05		0.08	5.14e-05	0.08	7.4e-05	0.005	2.93e-05	0.005	4.7e-05
0.1	4.5e-05	0.1	4.8e-05	0.06	0.000194	0.01	0.000139	0.05	6.5e-05		0.1	5.2e-05	0.08	5.2e-05	0.008	4.45e-05	0.008	5.2e-05		0.1	5.5e-05	0.1	8e-05	0.008	3.09e-05	0.008	5.6e-05
0.2	6.7e-05	0.2	7.3e-05	0.07	0.000201	0.02	0.000268	0.06	6.9e-05		0.2	8.53e-05	0.2	9.9e-05	0.01	2.8e-05	0.02	0.00011		0.2	8.25e-05	0.1	9.8e-05	0.01	3.9e-05	0.01	7.9e-05
0.3	8.4e-05	0.3	9.9e-05	0.08	0.000237	0.03	0.000364	0.07	7.9e-05		0.3	0.0001048	0.3	0.000114	0.03	4.38e-05	0.03	0.000139		0.3	9.73e-05	0.3	0.000139	0.03	5.48e-05	0.03	0.000149
0.4	9.9e-05	0.4	0.000122	0.1	0.000307	0.04	0.000468	0.08	8.9e-05		0.4	0.0001186	0.5	0.000137	0.04	4.71e-05	0.04	0.000168		0.4	0.0001137	0.4	0.000171	0.04	6.05e-05	0.04	0.000174
0.5	0.000111	0.5	0.000139	0.2	0.000425	0.05	0.000508	0.1	0.000108		0.5	0.0001366	0.6	0.000137	0.05	5.09e-05	0.05	0.000199		0.5	0.000124	0.5	0.000194	0.05	6.68e-05	0.05	0.000201
0.6	0.000113	0.6	0.000141	0.3	0.000488	0.06	0.000631	0.2	0.000191		0.6	0.0001493	0.7	0.000253	0.06	7.99e-05	0.06	0.000232		0.6	0.0001463	0.6	0.000231	0.06	7.75e-05	0.06	0.000239
0.7	0.000125	0.7	0.000159	0.4	0.00055	0.07	0.000864	0.3	0.000259		0.7	0.0001551	0.8	0.000277	0.07	8.22e-05	0.07	0.00026		0.7	0.0001552	0.7	0.000249	0.07	8.23e-05	0.07	0.000269
0.8	0.000132	0.8	0.000171	0.5	0.000564	0.08	0.000721	0.4	0.000337		0.8	0.0001588	1	0.000309	0.08	8.53e-05	0.08	0.000277		0.8	0.0001606	0.8	0.000268	0.08	8.92e-05	0.08	0.000291
1	0.000141	1	0.000175	0.6	0.000596	0.1	0.000827	0.5	0.000361		1	0.000183	2	0.000364	0.1	9.14e-05	0.1	0.000306		1	0.0001704	1	0.000297	0.1	9.86e-05	0.1	0.000329
2	0.000207	2	0.000357	0.7	0.000598	0.2	0.00131	0.6	0.000448		2	0.0002283	3	0.00043	0.2	0.0001394	0.2	0.000564		2	0.0002455	2	0.000427	0.2	0.0001583	0.2	0.000621
3	0.000246	3	0.000431	0.8	0.000615	0.3	0.001489	0.7	0.000484		3	0.0002758	4	0.000497	0.3	0.0001605	0.3	0.000705		3	0.0002739	3	0.000527	0.3	0.0001907	0.3	0.000717
4	0.000263	4	0.000482	1	0.000686	0.4	0.001668	0.8	0.000517		4	0.0002881	5	0.000529	0.4	0.0001699	0.4	0.000743		4	0.0002854	4	0.000575	0.4	0.0001996	0.4	0.000786
5	0.000273	5	0.000505	3	0.000714	0.5	0.001548	1	0.000599		5	0.0002926	6	0.000661	0.5	0.0001722	0.5	0.000763		5	0.0002826	5	0.000593	0.5	0.0002058	0.5	0.000805
6	0.000293	6	0.000495	5	0.0007	0.6	0.001839	2	0.000852		6	0.0003	7	0.000655	0.6	0.000189	0.6	0.000845		6	0.0002858	6	0.000641	0.6	0.0002203	0.6	0.000891
7	0.000298	7	0.000524	7	0.000688	0.7	0.001884	3	0.001038		7	0.0002859	8	0.000698	0.7	0.0001903	0.7	0.000882		7	0.0002935	7	0.000636	0.7	0.0002287	0.7	0.000938
8	0.000303	8	0.000525	10	0.000714	0.8	0.001924	4	0.001066		8	0.0003	10	0.000703	0.8	0.0001915	0.8	0.000882		8	0.0002953	8	0.00067	0.8	0.0002266	0.8	0.000942
10	0.00031	10	0.000559			1	0.002064	5	0.00111		10	0.0002893	20	0.000752	1	0.0001927	1	0.000894		10	0.0002994	10	0.000647	1	0.0002322	1	0.000907
20	0.000328	20	0.0007			2	0.002339	6	0.001169		20	0.0003095	30	0.000754	2	0.0002324	2	0.000904		20	0.0003365	20	0.000817	2	0.0002757	2	0.001105
30	0.000331	30	0.000741			3	0.002413	7	0.001241		30	0.0003186	40	0.000809	3	0.0002407	3	0.000886		30	0.0003295	30	0.000851	3	0.0002837	3	0.001135
40	0.000337	40	0.000742			4	0.002377	8	0.001233		40	0.0003131	50	0.000778	4	0.0002462	4	0.000912		40	0.0003361	40	0.00083	4	0.0002833	4	0.001124
50	0.000335	50	0.000724			5	0.002376	10	0.001316		50	0.0003177	60	0.000824	5	0.0002279	5	0.000879		50	0.0003275	50	0.000833	5	0.0002763	5	0.001077
60	0.000327	60	0.000763			6	0.002314	20	0.001477		60	0.0003101	70	0.000828	7	0.0002204	6	0.001018		60	0.0003033	60	0.000819	6	0.0002767	6	0.001117
70	0.000333	70	0.000779			7	0.002369	30	0.001492		70	0.000323	80	0.000833	8	0.0002204	7	0.001065		70	0.0003063	70	0.000826	7	0.000287	7	0.001122
80	0.000332	80	0.000793			8	0.002353	40	0.001493		80	0.000319	100	0.000821	10	0.0002108	8	0.001087		80	0.000304	80	0.000827	8	0.0002856	8	0.001118
100	0.000328	100	0.000771			10	0.002307	50	0.001452		100	0.000327					10	0.001026		100	0.0002943	100	0.000823	10	0.0002755	10	0.001042
								60	0.001445
								70	0.001418
								80	0.001429
								100	0.001445

## Sheet: Fig.5AB
Epac1		Epac1		Epac1		Epac1			Epac2		Epac2		Epac2		Epac2
[cAMP] / μM	kobs / s-1	[D-007] / μM	kobs / s-1	[S-220] / μM	kobs / s-1	[S-230] / μM	kobs / s-1		[cAMP] / μM	kobs / s-1	[D-007] / μM	kobs / s-1	[S-220] / μM	kobs / s-1	[S-230] / μM	kobs / s-1
0.01	1.1e-05	0.01	4.6e-05	0.01	1.6e-05	0.3	1e-05		0.2	1.9e-05	0.3	1.59e-05	0.001	1.9e-05	0.2	2.5e-05
0.05	1.4e-05	0.05	0.000133	0.05	1.5e-05	0.5	1e-05		0.3	2e-05	0.5	1.62e-05	0.03	4.4e-05	0.3	2.9e-05
0.08	2.5e-05	0.08	0.000193	0.08	1.6e-05	0.8	1.1e-05		0.4	2.1e-05	0.8	1.75e-05	0.04	4.9e-05	0.4	3.1e-05
0.1	2.8e-05	0.1	0.000213	0.1	1.7e-05	1	1.4e-05		0.5	2.1e-05	1	1.95e-05	0.05	5.4e-05	0.5	3.3e-05
0.3	3e-05	0.2	0.000391	0.2	1.7e-05	2	2.1e-05		0.6	2.5e-05	2	2.18e-05	0.06	6e-05	0.6	3.6e-05
0.5	3.8e-05	0.3	0.000569	0.3	2e-05	3	2.6e-05		0.7	2.36e-05	3	2.37e-05	0.07	6.8e-05	0.7	4e-05
0.8	4.7e-05	0.4	0.000728	0.5	2.2e-05	4	3e-05		0.8	2.47e-05	4	2.69e-05	0.08	6.9e-05	0.8	4.1e-05
1	5e-05	0.5	0.000822	0.5	2.2e-05	5	3.3e-05		1	2.84e-05	5	2.86e-05	0.1	9.1e-05	1	4.7e-05
2	6.1e-05	0.6	0.000999	0.6	2.5e-05	6	3.8e-05		2	3.47e-05	6	3.39e-05	0.2	0.00016	2	8.9e-05
3	9.3e-05	0.7	0.001133	0.7	2.7e-05	7	4.1e-05		3	4.1e-05	7	3.51e-05	0.3	0.000217	3	0.000128
4	0.000116	0.8	0.00123	0.8	2.8e-05	10	5.6e-05		4	4.71e-05	8	3.74e-05	0.4	0.000258	4	0.000139
5	0.000161	1	0.001369	1	4.3e-05	20	9.4e-05		5	5.23e-05	10	4.22e-05	0.5	0.000295	5	0.000145
6	0.000161	2	0.00219	2	5.8e-05	30	0.000115		6	5.05e-05	20	5.69e-05	0.6	0.000369	6	0.000194
7	0.000189	3	0.002658	3	7.9e-05	40	0.000131		7	5.49e-05	30	7e-05	0.7	0.000402	7	0.000209
8	0.00021	4	0.002829	4	9.2e-05	50	0.000148		8	6.35e-05	40	7.51e-05	0.8	0.000428	8	0.000213
10	0.000256	5	0.002931	5	0.000102	60	0.000156		10	7.22e-05	50	7.76e-05	1	0.000509	10	0.000238
20	0.000421	6	0.003122	6	0.000128	70	0.000164		20	0.0001155	60	8.43e-05	2	0.000819	20	0.000358
30	0.000589	7	0.003208	7	0.000149	80	0.00017		30	0.0001425	70	8.92e-05	3	0.000975	30	0.000429
40	0.000692	8	0.003277	8	0.000153	100	0.000198		40	0.0001592	80	9.01e-05	4	0.001024	40	0.000467
50	0.000746	20	0.003507	10	0.000213	200	0.000232		50	0.0001671	100	9.57e-05	5	0.001098	50	0.000491
60	0.000796	30	0.003635	20	0.000263	400	0.000232		60	0.0001922	200	9.52e-05	6	0.001139	60	0.000519
70	0.000848	40	0.003777	30	0.000312	600	0.000218		70	0.0001982	400	9.57e-05	7	0.001176	70	0.00055
80	0.000859	50	0.003479	40	0.00033	800	0.000186		80	0.000203	600	9.06e-05	8	0.001177	80	0.000558
100	0.000937	60	0.003633	50	0.000328				100	0.0002072	800	8.29e-05	10	0.001247	100	0.000582
200	0.001125	70	0.003598	60	0.000336				200	0.0002194			20	0.001488	200	0.000643
400	0.001195	80	0.003593	70	0.000338				400	0.000212			30	0.001525	400	0.00061
600	0.001161	100	0.003489	80	0.000331				600	0.0002074			40	0.001523	600	0.000556
800	0.001181								800	0.0002239			50	0.001502	800	0.000527
													60	0.00155
													70	0.001547
													80	0.00152
													100	0.001499

## Sheet: Fig.5CDEF
PKAIα			PKAIα			PKAIα			PKAIα				PKAIβ			PKAIβ			PKAIβ			PKAIβ				PKAIIα			PKAIIα			PKAIIα			PKAIIα				PKAIIβ			PKAIIβ			PKAIIβ			PKAIIβ
[cAMP] / μM	A / U/mg	SD	[D-007] / μM	A / U/mg	SD	[S-220] / μM	A / U/mg	SD	[S-230] / μM	A / U/mg	SD		[cAMP] / μM	A / U/mg	SD	[D-007] / μM	A / U/mg	SD	[S-220] / μM	A / U/mg	SD	[S-230] / μM	A / U/mg	SD		[cAMP] / μM	A / U/mg	SD	[D-007] / μM	A / U/mg	SD	[S-220] / μM	A / U/mg	SD	[S-230] / μM	A / U/mg	SD		[cAMP] / μM	A / U/mg	SD	[D-007] / μM	A / U/mg	SD	[S-220] / μM	A / U/mg	SD	[S-230] / μM	A / U/mg
1e-05	2.9393	1.84932	1e-05	2.6923	1.69391	1e-05	3.6309	2.28445	1e-05	2.7664	1.74053		1e-05	4.525	0.950986	1e-05	4.53	0.950986	1e-05	4.525	0.950986	1e-05	4.53	0.950986		1e-05	3.78155	0.894883	1e-05	3.78155	0.894883	1e-05	3.78155	0.894883	1e-05	3.78155	0.894883		1e-05	2.8563	1.18445	1e-05	2.8563	1.18445	1e-05	2.8563	1.18445	1e-05	2.01887
0.001	1.4399	0.218779	0.001	3.6515	0.262054	0.01	3.6309	0.311834	10	1.9936	1.36217		100	24.425	0.353553	0.001	4.7	1.23744	0.01	4.3125	1.14905	10	2.81	0.548008		0.001	5.67726	0.823831	0.01	4.45295	0.684199	0.0001	4.73928	0.809868	0.01	4.54181	0.139632		0.01	4.08708	0.314004	0.1	6.55413	0.918753	0.001	4.48181	0.383783	0.1	1.47201
0.01	4.4268	1.75583	0.1	3.7714	0.863236	0.001	3.7632	0.956291	0.01	2.632	0.079196		10	23.725	0.53033	1	5.38	1.6617	0.001	4.35	1.27279	250	3.19	0.689429		0.0001	5.69701	0.823831	0.1	4.917	0.754015	0.001	5.19346	0.418897	0.1	5.02561	1.2148		0.0001	4.25155	0.732676	1	6.98998	0.790825	0.0001	4.9341	0.209336	0.001	1.94075
0.025	7.9492	0.235609	1	3.924	0.462448	0.1	9.4227	2.26599	500	2.9232	0.459337		1	23.5333	0.469264	0.1	5.43	1.20208	0.1	7.7375	0.548008	0.001	4.71	0.441942		0.01	7.55323	0.879683	0.0001	4.93675	0.139632	0.01	5.81549	0.656272	0.0001	5.24283	0.628346		0.001	4.30911	0	10	10.6165	1.15135	0.01	5.37817	1.0932	0.01	1.96542
0.05	9.6152	0.538533	2.5	7.9352	0.154149	0.25	13.3476	0.166312	1	2.9904	1.02955		0.1	22.3375	1.32583	10	9.18	1.0253	0.17	11.1375	0.335876	0.1	5.21	0.866206		0.025	10.1895	0.251341	0.001	5.04536	1.24273	0.025	8.01728	0.530603	1	8.2345	1.67559		0.025	5.47685	0.0465191	50	14.5556	0.465191	0.1	10.781	1.33742	1	2.85355
0.1	14.3117	1.74006	10	10.5839	0.262054	1	19.7421	1.97495	0.001	3.2928	1.45721		0.05	15.375	0.671751	25	13.1	1.21976	0.25	13.8375	0.053033					0.1	15.7976	0.921572	1	7.99754	0.279263	0.1	10.9497	1.18688	5	10.9892	0.572495		0.05	9.07052	0.0581482	250	16.0029	0.814085	0.25	16.0276	0.918751	10	3.18249
0.25	19.2542	0.269266	25	12.2407	0.0154149	250	24.0198	1.58351	0.1	3.8864	0.332623		0.025	10.75	0.353553	250	16	0.654074	0.5	15.9375	0.0883883					0.25	19.046	1.10309	2.5	9.51806	0.80987	0.25	14.0006	1.12709	10	12.1938	0.879683		0.1	11.2662	0.255852	500	18.7085	0.360525	1	19.2348	1.54676	50	6.80083
10	23.4351	0.980529	100	15.8268	0.770746	50	25.1517	0.519723					0.01	7.2375	0.795495	2500	17.9	2.58094	1	20.4125	1.00763					1	22.867	0.139632	10	11.3743	0.390973	1	17.3576	0.642308	50	15.7976	0.0558473		0.25	15.6658	1.29091				250	24.4156	1.26764	500	9.03763
1	23.7207	1.06658	500	17.8542	1.66481	10	25.8818	0.623899					0.001	2.9	0	1000	18.4	1.69706	250	23.1875	0.477297					10	24.2789	0.237376	50	13.9019	0.251341	250	22.8078	0.418897	250	17.6341	0.670238		0.5	18.1027	0.930576				10	24.9008	0.511705
100	25.0852	0.0673166	250	18.3229	1.46442														10	23.4125	1.57331					100	25.1577	0.139632	250	15.6692	0.963468	10	23.0349	1.2148	500	21.0799	1.46614		1	21.3729	0.290741
																										250	25.5329	0.139632	500	17.6538	0.139632				1000	22.9756	1.60578		100	24.5554	0.651267
																													1000	19.6878	1.42425								10	25.0406	0.942015
[truncated: 1 more columns]

## Sheet: Fig.6C
	Epac1		Epac2		PKA
	rel. RapGTP	SD	rel. RapGTP	SD	rel. P-VASP	SD
control	0.2506	0.2233	0.3704	0.1043	0.1371	0.0795
L-026	1.1255	0.1102	0.7828	0.0993	0.9052	0.2173
D-007	1.65	0.3142	0.3431	0.0334	0.1351	0.0609
S-220	0.6097	0.3361	1.2025	0.2227	0.1961	0.0935
S-223	0.2476	0.2998	0.4251	0.0664	0.143	0.059

## Sheet: Fig.6D
	ISI*	SD			ISI*	SD
control	7.647	1.30088		control	3.30338	0.75475
Fsk/IBMX	13.73	2.06187		Fsk/IBMX	15.3666	5.60784
50 μM S-220	12.292	3.86775		25 μM S-220	9.47179	2.35871
				50 μM S-220	9.68769	3.66091
				100 μM S-220	10.964	2.54101
*ISI, insulin secretion index
