# Supplementary material for: Refactoring for paradigm change in the interactive data language
Source: PLOS journal article supplement (doi:10.1371/journal.pbio.1002038), 2007-01-01
Supplement: S4 (10.1371/journal.pbio.1002038.s004) [file journal.pbio.1002038.s004]

**Table S1.** Abbreviations of cAMP analogues

|                 | cAMP                                | Adenosine-3',5'-cyclic monophosphate                               |
|-----------------|-------------------------------------|--------------------------------------------------------------------|
| 2'-modification | Z-001 2'-dcAMP                      | 2'-Deoxyadenosine-3',5'-cyclic monophosphate                       |
|                 | <b>Z-002 2'-F-cAMP</b>              | 2'-Deoxy-2'-fluoroadenosine-3',5'-cyclic monophosphate             |
|                 | <b>Z-003 2'-NH<sub>2</sub>-cAMP</b> | 2'-Deoxy-2'-aminoadenosine-3',5'-cyclic monophosphate              |
|                 | Z-004 2'-O-Me-cAMP                  | 2'-O-Methyladenosine-3',5'-cyclic monophosphate                    |
|                 | Z-005 2'-O-Pr-cAMP                  | 2'-O-Propyladenosine-3',5'-cyclic monophosphate                    |
|                 | Z-006 2'-O-Bu-cAMP                  | 2'-O-Butyladenosine-3',5'-cyclic monophosphate                     |
|                 | <b>Z-007 2'-O-AlI-cAMP</b>          | 2'-O-Allyladenosine-3',5'-cyclic monophosphate                     |
|                 | <b>Z-008 2'-O-Bn-cAMP</b>           | 2'-O-Benzyladenosine-3',5'-cyclic monophosphate                    |
| 8-modification  | L-001 8-Cl-cAMP                     | 8-Chloroadenosine-3',5'-cyclic monophosphate                       |
|                 | L-002 8-Br-cAMP                     | 8-Bromoadenosine-3',5'-cyclic monophosphate                        |
|                 | L-003 8-NH <sub>2</sub> -cAMP       | 8-Aminoadenosine-3',5'-cyclic monophosphate                        |
|                 | L-004 8-N <sub>3</sub> -cAMP        | 8-Azidoadenosine-3',5'-cyclic monophosphate                        |
|                 | L-005 8-MeA-cAMP                    | 8-Methylaminoadenosine-3',5'-cyclic monophosphate                  |
|                 | L-006 8-AEA-cAMP                    | 8-(2-Aminoethylamino)adenosine-3',5'-cyclic monophosphate          |
|                 | L-007 8-OHEA-cAMP                   | 8-(2-Hydroxyethylamino)adenosine-3',5'-cyclic monophosphate        |
|                 | L-008 8-OHBuA-cAMP                  | 8-(4-Hydroxybutylamino)adenosine-3',5'-cyclic monophosphate        |
|                 | L-009 8-HA-cAMP                     | 8-Hexylaminoadenosine-3',5'-cyclic monophosphate                   |
|                 | L-010 8-AHA-cAMP                    | 8-(6-Aminohexylamino)adenosine-3',5'-cyclic monophosphate          |
|                 | <b>L-011 8-AIIA-cAMP</b>            | 8-Allylaminoadenosine-3',5'-cyclic monophosphate                   |
|                 | L-012 8-(S-2-OHPrA)-cAMP            | 8-(2-(+)-S-Hydroxypropylamino)adenosine-3',5'-cyclic monophosphate |
|                 | <b>L-013 8-cHA-cAMP</b>             | 8-cycloHexylaminoadenosine-3',5'-cyclic monophosphate              |
|                 | L-014 8-BnA-cAMP                    | 8-Benzylaminoadenosine-3',5'-cyclic monophosphate                  |
|                 | L-015 8-DMeA-cAMP                   | 8-Dimethylaminoadenosine-3',5'-cyclic monophosphate                |
|                 | L-016 8-DEA-cAMP                    | 8-Diethylaminoadenosine-3',5'-cyclic monophosphate                 |
|                 | L-017 8-Pyr-cAMP                    | 8-Pyrrolidinoadenosine-3',5'-cyclic monophosphate                  |
|                 | L-018 8-PIP-cAMP                    | 8-Piperidinoadenosine-3',5'-cyclic monophosphate                   |
|                 | L-019 8-PIA-cAMP                    | 8-Piperazinoadenosine-3',5'-cyclic monophosphate                   |
|                 | <b>L-020 8-Morph-cAMP</b>           | 8-Morpholinoadenosine-3',5'-cyclic monophosphate                   |
|                 | L-021 8-OH-cAMP                     | 8-Hydroxyadenosine-3',5'-cyclic monophosphate                      |
|                 | L-022 8-MeO-cAMP                    | 8-Methoxyadenosine-3',5'-cyclic monophosphate                      |
|                 | L-023 8-BnO-cAMP                    | 8-Benzyloxyadenosine-3',5'-cyclic monophosphate                    |
|                 | L-024 8-MeT-cAMP                    | 8-Methylthioadenosine-3',5'-cyclic monophosphate                   |
|                 | L-025 8-BnT-cAMP                    | 8-Benzylthioadenosine-3',5'-cyclic monophosphate                   |
|                 | L-026 8-pCPT-cAMP                   | 8-(4-Chlorophenylthio)adenosine-3',5'-cyclic monophosphate         |
|                 | <b>L-027 8-MeSe-cAMP</b>            | 8-Methylselenoadenosine-3',5'-cyclic monophosphate                 |
|                 | <b>L-028 8-BnSe-cAMP</b>            | 8-Benzylselenoadenosine-3',5'-cyclic monophosphate                 |

**Table S1.** Continuation 1 of 2

|                                                 |              |                               |                                                                                         |
|-------------------------------------------------|--------------|-------------------------------|-----------------------------------------------------------------------------------------|
|                                                 | N-001        | N <sup>6</sup> -Bn-cAMP       | N <sup>6</sup> -Benzyladenosine-3',5'-cyclic monophosphate                              |
|                                                 | N-002        | N <sup>6</sup> -Bnz-cAMP      | N <sup>6</sup> -Benzoyladenosine-3',5'-cyclic monophosphate                             |
|                                                 | N-003        | N <sup>6</sup> -Phe-cAMP      | N <sup>6</sup> -Phenyladenosine-3',5'-cyclic monophosphate                              |
| 2'-modification + 8-modification                | <b>D-001</b> | <b>8-MeA-2'-Cl-cAMP</b>       | 8-Methylamino-2'-deoxy-2'-chloroadenosine-3',5'-cyclic monophosphate                    |
|                                                 | <b>D-002</b> | <b>8,2'-DMeT-cAMP</b>         | 8,2'-Dimethylthioadenosine-3',5'-cyclic monophosphate                                   |
|                                                 | <b>D-003</b> | <b>8-Br-2'-Cl-cAMP</b>        | 8-Bromo-2'-deoxy-2'-chloroadenosine-3',5'-cyclic monophosphate                          |
|                                                 | <b>D-004</b> | <b>8-Br-2'-F-cAMP</b>         | 8-Bromo-2'-deoxy-2'-fluoroadenosine-3',5'-cyclic monophosphate                          |
|                                                 | D-005        | 8-Br-2'-O-Me-cAMP             | 8-Bromo-2'-O-methyladenosine-3',5'-cyclic monophosphate                                 |
|                                                 | <b>D-006</b> | <b>8,2'-DCI-cAMP</b>          | 8,2'-Dichloroadenosine-3',5'-cyclic monophosphate                                       |
|                                                 | D-007        | 8-pCPT-2'-O-Me-cAMP           | 8-(4-Chlorophenylthio)-2'-O-methyladenosine-3',5'-cyclic monophosphate                  |
|                                                 | D-008        | 8-pOHT-2'-O-Me-cAMP           | 8-(4-Hydroxyphenylthio)-2'-O-methyladenosine-3',5'-cyclic monophosphate                 |
|                                                 | D-009        | 8-pMeOPT-2'-O-Me-cAMP         | 8-(4-Methoxyphenylthio)-2'-O-methyladenosine-3',5'-cyclic monophosphate                 |
|                                                 | D-010        | 8-OH-2'-O-Me-cAMP             | 8-Hydroxy-2'-O-methyladenosine-3',5'-cyclic monophosphate                               |
|                                                 | <b>D-011</b> | <b>8-BnT-2'-F-cAMP</b>        | 8-Benzylthio-2'-deoxy-2'-fluoroadenosine-3',5'-cyclic monophosphate                     |
|                                                 | <b>D-012</b> | <b>8-BnSe-2'-O-Bn-cAMP</b>    | 8-Benzylseleno-2'-O-benzyladenosine-3',5'-cyclic monophosphate                          |
|                                                 | <b>D-013</b> | <b>8-BnSe-2'-O-Me-cAMP</b>    | 8-Benzylseleno-2'-O-methyladenosine-3',5'-cyclic monophosphate                          |
|                                                 | S-000        | Sp-cAMPS                      | Adenosine-3',5'-cyclic monophosphorothioate, Sp- isomer                                 |
| phosphorothioate with 8- and/or 2'-modification | S-010        | Sp-8-Br-cAMPS                 | 8-Bromoadenosine-3',5'-cyclic monophosphorothioate, Sp- isomer                          |
|                                                 | S-011        | Sp-8-Br-2'dcAMPS              | 8-Bromo-2'-deoxyadenosine-3',5'-cyclic monophosphorothioate, Sp- isomer                 |
|                                                 | <b>S-012</b> | <b>Sp-8-Br-2'-F-cAMPS</b>     | 8-Bromo-2'-deoxy-2'-fluoroadenosine-3',5'-cyclic monophosphorothioate, Sp- isomer       |
|                                                 | <b>S-013</b> | <b>Sp-8-Br-2'-Cl-cAMPS</b>    | 8-Bromo-2'-deoxy-2'-chloroadenosine-3',5'-cyclic monophosphorothioate, Sp- isomer       |
|                                                 | S-014        | Sp-8-Br-2'-O-Me-cAMPS         | 8-Bromo-2'-O-methyladenosine-3',5'-cyclic monophosphorothioate, Sp- isomer              |
|                                                 | S-020        | Sp-8-Cl-cAMPS                 | 8-Chloroadenosine-3',5'-cyclic monophosphorothioate, Sp- isomer                         |
|                                                 | <b>S-021</b> | <b>Sp-8,2'-Cl-cAMPS</b>       | 8,2'-Dichloroadenosine-3',5'-cyclic monophosphorothioate, Sp- isomer                    |
|                                                 | <b>S-030</b> | <b>Sp-8-MeA-cAMPS</b>         | 8-Methylaminoadenosine-3',5'-cyclic monophosphorothioate, Sp- isomer                    |
|                                                 | <b>S-031</b> | <b>Sp-8-MeA-2'-dcAMPS</b>     | 8-Methylamino-2'-deoxyadenosine-3',5'-cyclic monophosphorothioate, Sp- isomer           |
|                                                 | <b>S-032</b> | <b>Sp-8-MeA-2'-F-cAMPS</b>    | 8-Methylamino-2'-deoxy-2'-fluoroadenosine-3',5'-cyclic monophosphorothioate, Sp- isomer |
|                                                 | <b>S-033</b> | <b>Sp-8-MeA-2'-Cl-cAMPS</b>   | 8-Methylamino-2'-deoxy-2'-chloroadenosine-3',5'-cyclic monophosphorothioate, Sp- isomer |
|                                                 | <b>S-034</b> | <b>Sp-8-MeA-2'-O-Me-cAMPS</b> | 8-Methylamino-2'-O-methyladenosine-3',5'-cyclic monophosphorothioate, Sp- isomer        |
|                                                 | <b>S-040</b> | <b>Sp-8-EA-cAMPS</b>          | 8-Ethylaminoadenosine-3',5'-cyclic monophosphorothioate, Sp- isomer                     |
|                                                 | <b>S-050</b> | <b>Sp-8-iPrA-cAMPS</b>        | 8- <i>iso</i> Propylaminoadenosine-3',5'-cyclic monophosphorothioate, Sp- isomer        |
|                                                 | S-060        | Sp-8-ADOA-cAMPS               | 8-(8-Amino-3,6-dioxaoctylamino)adenosine-3',5'-cyclic monophosphorothioate, Sp- isomer  |
|                                                 | <b>S-070</b> | <b>Sp-8-DMeA-cAMPS</b>        | 8-Dimethylaminoadenosine-3',5'-cyclic monophosphorothioate, Sp- isomer                  |
|                                                 | <b>S-080</b> | <b>Sp-8-EMeA-cAMPS</b>        | 8-Ethylmethylaminoadenosine-3',5'-cyclic monophosphorothioate, Sp- isomer               |
|                                                 | <b>S-090</b> | <b>Sp-8-DEA-cAMPS</b>         | 8-Diethylaminoadenosine-3',5'-cyclic monophosphorothioate, Sp- isomer                   |
|                                                 | <b>S-100</b> | <b>Sp-8-iPrMeA-cAMPS</b>      | 8- <i>iso</i> Propylmethylaminoadenosine-3',5'-cyclic monophosphorothioate, Sp- isomer  |
|                                                 | S-110        | Sp-8-PIP-cAMPS                | 8-Piperidinoadenosine-3',5'-cyclic monophosphorothioate, Sp- isomer                     |

**Table S1.** Continuation 2 of 2

|                                                 |              |                                 |                                                                                                   |
|-------------------------------------------------|--------------|---------------------------------|---------------------------------------------------------------------------------------------------|
| phosphorothioate with 8- and/or 2'-modification | S-120        | Sp-8-PIA-cAMPS                  | 8-Piperazinoadenosine-3',5'-cyclic monophosphorothioate, Sp- isomer                               |
|                                                 | <b>S-130</b> | <b>Sp-8-OH-cAMPS</b>            | 8-Hydroxyadenosine-3',5'-cyclic monophosphorothioate, Sp- isomer                                  |
|                                                 | <b>S-140</b> | <b>Sp-8-MeO-cAMPS</b>           | 8-Methoxyadenosine-3',5'-cyclic monophosphorothioate, Sp- isomer                                  |
|                                                 | <b>S-150</b> | <b>Sp-8-BnO-cAMPS</b>           | 8-Benzyloxyadenosine-3',5'-cyclic monophosphorothioate, Sp- isomer                                |
|                                                 | <b>S-160</b> | <b>Sp-8-MeT-cAMPS</b>           | 8-Methylthioadenosine-3',5'-cyclic monophosphorothioate, Sp- isomer                               |
|                                                 | <b>S-170</b> | <b>Sp-8-MeT-2'-F-cAMPS</b>      | 8-Methylthio-2'-deoxy-2'-fluoroadenosine-3',5'-cyclic monophosphorothioate, Sp- isomer            |
|                                                 | <b>S-180</b> | <b>Sp-8-MeT-2'-O-Me-cAMPS</b>   | 8-Methylthio-2'-O-methyladenosine-3',5'-cyclic monophosphorothioate, Sp- isomer                   |
|                                                 | <b>S-190</b> | <b>Sp-8-PheET-cAMPS</b>         | 8-Phenylethylthioadenosine-3',5'-cyclic monophosphorothioate, Sp- isomer                          |
|                                                 | <b>S-200</b> | <b>Sp-8-pOHPT-cAMPS</b>         | 8-(4-Hydroxyphenylthio)adenosine-3',5'-cyclic monophosphorothioate, Sp- isomer                    |
|                                                 | <b>S-201</b> | <b>Sp-8-pOHPT-2'-F-cAMPS</b>    | 8-(4-Hydroxyphenylthio)-2'-deoxy-2'-fluoroadenosine-3',5'-cyclic monophosphorothioate, Sp- isomer |
|                                                 | <b>S-202</b> | <b>Sp-8-pOHPT-2'-O-Me-cAMPS</b> | 8-(4-Hydroxyphenylthio)-2'-O-methyladenosine-3',5'-cyclic monophosphorothioate, Sp- isomer        |
|                                                 | S-210        | Sp-8-pCPT-cAMPS                 | 8-(4-Chlorophenylthio)adenosine-3',5'-cyclic monophosphorothioate, Sp- isomer                     |
|                                                 | S-211        | Sp-8-pCPT-2'-O-Me-cAMPS         | 8-(4-Chlorophenylthio)-2'-O-methyladenosine-3',5'-cyclic monophosphorothioate, Sp- isomer         |
|                                                 | <b>S-220</b> | <b>Sp-8-BnT-cAMPS</b>           | 8-Benzylthioadenosine-3',5'-cyclic monophosphorothioate, Sp- isomer                               |
|                                                 | <b>S-221</b> | <b>Sp-8-BnT-2'-dcAMPS</b>       | 8-Benzylthio-2'-deoxyadenosine-3',5'-cyclic monophosphorothioate, Sp- isomer                      |
|                                                 | <b>S-222</b> | <b>Sp-8-BnT-2'-F-cAMPS</b>      | 8-Benzylthio-2'-deoxy-2'-fluoroadenosine-3',5'-cyclic monophosphorothioate, Sp- isomer            |
|                                                 | <b>S-223</b> | <b>Sp-8-BnT-2'-O-Me-cAMPS</b>   | 8-Benzylthio-2'-O-methyladenosine-3',5'-cyclic monophosphorothioate, Sp- isomer                   |
|                                                 | <b>S-230</b> | <b>Sp-8-pMeBnT-cAMPS</b>        | 8-(4-Methylbenzylthio)adenosine-3',5'-cyclic monophosphorothioate, Sp- isomer                     |
|                                                 | <b>S-240</b> | <b>Sp-8-ptBuBnT-cAMPS</b>       | 8-(4- <i>tert</i> Butylbenzylthio)adenosine-3',5'-cyclic monophosphorothioate, Sp- isomer         |
|                                                 | <b>S-250</b> | <b>Sp-8-pMeOBnT-cAMPS</b>       | 8-(4-Methoxybenzylthio)adenosine-3',5'-cyclic monophosphorothioate, Sp- isomer                    |
|                                                 | <b>S-260</b> | <b>Sp-8-pCBnT-cAMPS</b>         | 8-(4-Chlorobenzylthio)adenosine-3',5'-cyclic monophosphorothioate, Sp- isomer                     |
|                                                 | <b>S-270</b> | <b>Sp-8-oCBnT-cAMPS</b>         | 8-(2-Chlorobenzylthio)adenosine-3',5'-cyclic monophosphorothioate, Sp- isomer                     |
|                                                 | <b>S-280</b> | <b>Sp-8-pFBnT-cAMPS</b>         | 8-(4-Fluorobenzylthio)adenosine-3',5'-cyclic monophosphorothioate, Sp- isomer                     |
|                                                 | <b>S-290</b> | <b>Sp-8-mNBnT-cAMPS</b>         | 8-(3-Nitrobenzylthio)adenosine-3',5'-cyclic monophosphorothioate, Sp- isomer                      |
|                                                 | <b>S-300</b> | <b>Sp-8-mTFMeBnT-cAMPS</b>      | 8-(3-Trifluoromethylbenzylthio)adenosine-3',5'-cyclic monophosphorothioate, Sp- isomer            |
|                                                 | S-400        | Sp-5,6-DCI-cBIMPS               | 5,6-Dichlorobenzimidazole riboside-3',5' cyclic monophosphorothioate, Sp- isomer                  |
|                                                 | R-000        | Rp-cAMPS                        | Adenosine-3',5'-cyclic monophosphorothioate, Rp- isomer                                           |

Analogues printed in bold were synthesised for the first time, to our knowledge, during this study. For a visualisation of the chemical structures see Figure 2.
